# Supplementary material for: Very old firn air linked to strong density layering at Styx Glacier, coastal Victoria Land, East Antarctica
Source: Copernicus journal article supplement (doi:10.5194/tc-13-2407-2019), 2019-09-17
Supplement: Supplementary file 1 [file tc-13-2407-2019-supplement.pdf]

Supplement of The Cryosphere, 13, 2407–2419, 2019  
<https://doi.org/10.5194/tc-13-2407-2019-supplement>  
© Author(s) 2019. This work is distributed under  
the Creative Commons Attribution 4.0 License.

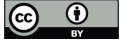

*Supplement of*

## **Very old firn air linked to strong density layering at Styx Glacier, coastal Victoria Land, East Antarctica**

**Youngjoon Jang et al.**

*Correspondence to:* Jinho Ahn (jinhoahn@gmail.com)

The copyright of individual parts of the supplement might differ from the CC BY 4.0 License.

1

2

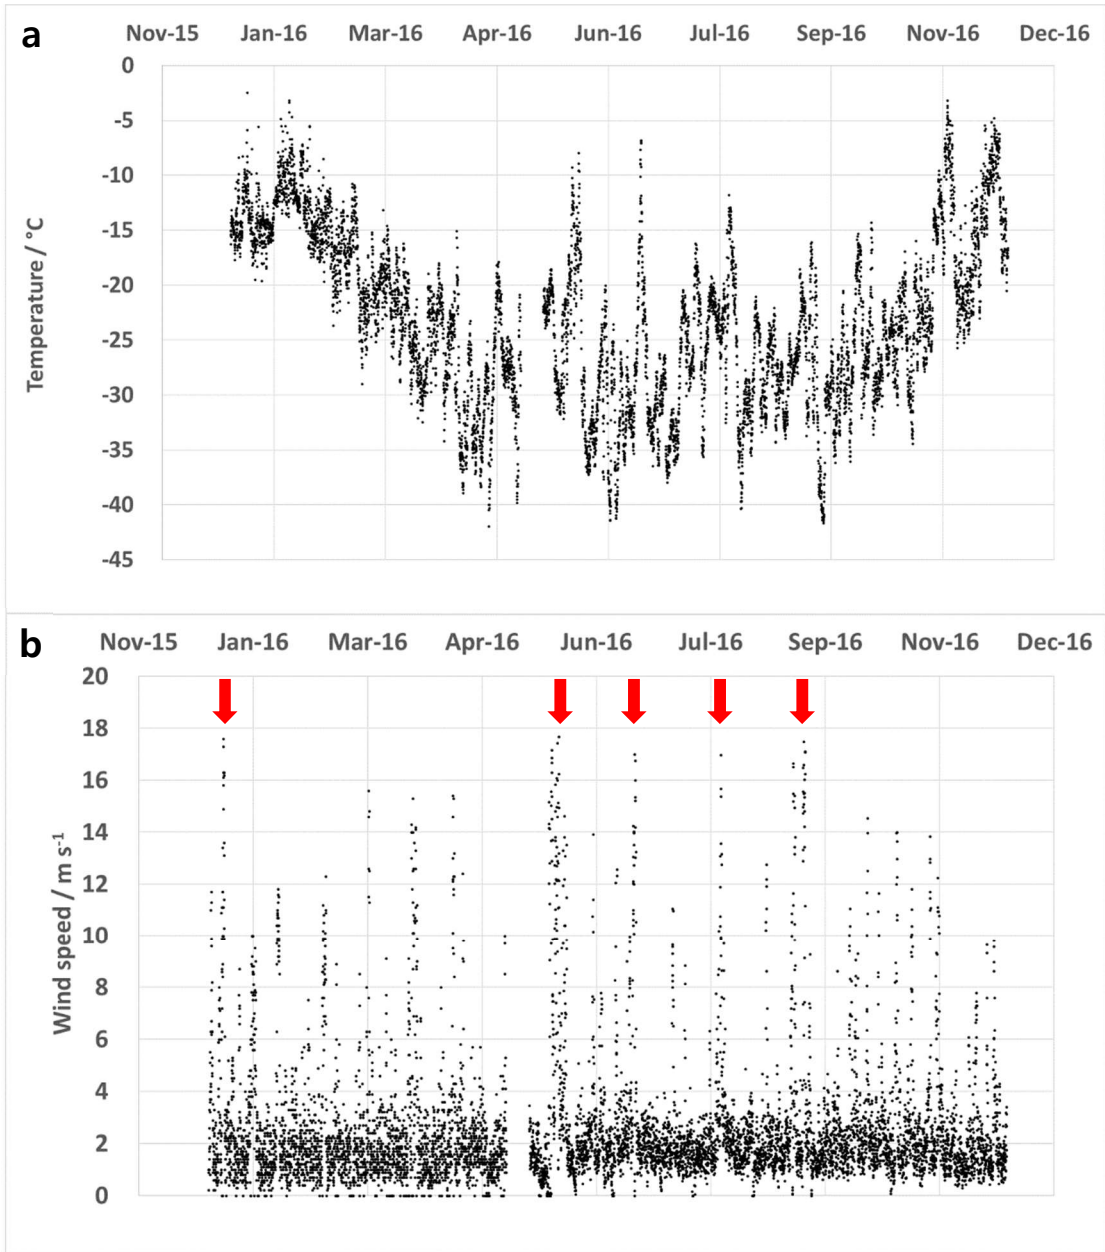

3

4 **Figure S1. (a) Surface air temperature and (b) wind speed data from AWS (Automatic Weather System)**

5 **at Styx Glacier during December 2015 to December 2016. Red arrows indicate blizzard events.**

6
